# Supplementary material for: Comparative Genomic and Transcriptomic Analyses of CHHs and Their Putative Receptors in Scylla paramamosain, Portunus trituberculatus, and Eriocheir sinensis
Source: Frontiers journal article supplement (doi:10.3389/fmars.2021.787007), 2021-11-22
Supplement: Data_Sheet_1.xlsx [file Data_Sheet_1.xlsx]

## Sheet: CHHs and CHHRs sequences
Scylla paramamosain
>Sp-CHH1-v1
MSTFTSVIQMAVLVACIAMATLPHTQGRSADGFGRMGRLLASLKADSLGPVQDYGVEGAAHPLEKRQIFDSSCKGVYDRAIFSELEHVCNDCYNLYRTSRVASGCRSNCYSNVVIRQCMEDLLLMDNFEEIARKIQMVGKK
>Sp-CHH1-v2
MSTFTSVIQMAVLVACIAMATLPHTQGRSADGFGRMGRLLASLKADSLGPVQDYGVEGAAHPLEKRQIFDSSCKGVYDRAIFSELEHVCNDCYNLYRTSRVASGCRANCFENHVFDDCVYDLLLHNPDEVLLMRDAIRG
>Sp-CHH2
MFDKITTLAVVMVVVIVIALNIDGGAAGPVKPRHNPVSTGGDAGQQHRRSRRATDLVDTSCKGYYDRDTWNELHHLCEDCDNLYRQFHFQAKCRSDCFASDVFATCLTDLGKNVEIYQAMAASLRGS
>Sp-MIH
MMSRANSRFSCQRTWLLAVVLLAALWSSSLQQAAARVINDDCPNLIGNRDLYKKVEWICDDCANIYRITGMASLCRKDCFFNEDFLWCVSAIERSEEMTQLKQWVRILGAGRI
>Sp-VIH
MWLLAVVVMAALWSLSVQRTAARMIDDECPNLIGNRDLYEKVDWICEDCANIFRKIRMGYRCRRNCFYNEEFTWCISATENTEHKKELMQWVAILRATPERHRSFLTSIQGGAAIRPHADDGTAY
>Sp-ITP-like
MMSQIRPLSLLALWVSVLAAAVLMQASTSSGAGLEDRAYRFRLWPGTQREFEHYECGAEFNKVTRKHYDELSRVCEDCKNIYRSESFVRQRCMSNCFDNEIFSYCTDILLHPIEKIKDYEEMKMQIKA
>Sp-GPCR-A34
MGEKYPCPEVLERGRALDNFEKVQVALVVALVVASVAGNAAVVAVISFNRLLRTSVNYYLANLAVADLLITLTCWPTLVNRFTAPLYVLGRSLCKITVLALATCINVSVLTLAVVAGGRLYAVLFPLRALRTSSHPVLLISLLWVASFVLALPGFYVRDTQVVKWNDLVEESCGDVLCSASSIAAFRYYRILLLITMFFLPETVMVLAYSVIVVRLYCVRRGPADRDAPLPAPLPTSDHPHSAARRKVVKMTAAVVAAFTVCWSPLQALSLYGLLSEDTCTYLKDDATCLGARSCKHRRVSLERSVSSSFISLCPVSQEAARVVFQR
>Sp-GPCR-A35
MAAHALHWSLHAHLLYPPANPENLSGVYGCSQDAGFTTNLSQFEYPYRMKTWVPITWREIIKVATYLFVFLVSLVGNLLVMLVVCYNRHMRSSTNQYLVNLAAADLLVTLVCMWVHIVRHLSHPHYILPAYVCKLDGFVQTTTLLASVLTLTVISVGRFVAVMFPLHARTSPDRANRVIAAVWIASALIACPILFYRKLYSIQWANFTTWQCDEFFPTEKEYVEADDRCEVIYDAKHLFYTILIIALFFLPVAIMIINYSLVVWTLWGAKQPGEQQSAATRNMATKAKKKVVKMVTVVLLVFVICWTPLLTLILFSLNHQGHLPEWFSSLEFAAYFIAYSNSALNPIIYCGFNTSFRQGLVALLSCRHAATGRIYHRRHWMGMTGGTRDTTVGCSGPEP…
>Sp-GPCR-A36
MPKKIQVWWMVNMIGLTWLPLLIMLSCYTTILVYFRSSGFRSRTNSEHPSITLMKRRVVIMMFVIVIAFTVFWLPFQILKICGNQMFFGEDGQIKSPEAQKSYDILYTMCHYLIYTNVAVNPIIYALMHQTFRRALRVTFPCLYHHKSAFVLTPGLGRQHYVWSMRSTSNVYSDVMAMSRQNPEERRRRMRASSAVVGSAAVAASIVIETNSENQRGNSSERSGQPETTVVQNETEDWRPNGGRPLADERYVRDLRPREISIVSTGALGQLITQVIEEESSSDVEVLVMLVSLESLATISCDRMMGVVRPFHTHLKTWQSLAIIIIIWVSSAVLAVPWGLYRVYTIHIWKDRTETNCGEKETLYMWWMALVGLAWLSLAIMLVSYFTILAYFRHPSFKN…
>Sp-GPCR-A37
MVAQSGPEWELLAGDEMVDPLSISCNLTCCKYSDDDDDIICFSDLNFTEYKNLTIWAPWELAVRWTFASLIMLVAVLGNLTIIIILAKNRLLLRTSVNHFILNMSVADLILALTGPIPFTVRDTSMFWPLGEAWCYLEGYIQMLVMLVSLESLATISCDRMMGVVRPFHTHLKTWQSLAIIIIIWVSSAVLAVPWGLYRVYTIHIWKDRTETNCGEKETLYMWWMALVGLAWLSLAIMLVSYFTILAYFRHPSFKNFSKREHPVMTHLKKRVVKMMFLVVVTFVVCWLPIQLLNIFHTNFLNDFGSLKDDTSKRNYAALMTVSQYMIYVNPAVNPVIYGLLHQNFRRAFRLTFPCIFTRKSTLVLTRGQGVTRYMWSVKSTGSQPSVTGQRRHCGERQV…
Portunus trituberculatus
>Pt-CHH1-v1
MQSIKSVCQVSLVAACIIFTLPWTQARSAEGFGRMGRLLASLKADSLTPMQGYGTETGHPLEKRQIYDSSCKGVYDRAIFSELEHVCDDCYNLYRTSRVASGCRSNCYSNMVIRQCMEDLLLMDNFEEYARKIQMVGKK
>Pt-CHH1-v2
MQSIKSVCQVSLVAACIIFTLPWTQARSAEGFGRMGRLLASLKADSLTPMQGYGTETGHPLEKRQIYDSSCKGVYDRAIFSELEHVCDDCYNLYRTSRVASGCRENCFENDLFEECVFELMLPDEMFLIRDAIRG
>Pt-CHH2
MFDKVRITTLAVVMVVVMVIALNIDIVATSPVKPPHSLASVQASTLLGNVGQQHRQPRSVTNLVDPSCKGRYDRDAWNELCHVCEDCDNLRREFEFQAKCRDGCFASEVFVDCLYDLGKDVDLYLEMASSLRG
>Ptr-MIH
MVSRAHSRFSCQRTTLLAVVLLAVLWSSSLQQAAARVINDDCPNLMGNRDLYKKVEWICDDCANIYRSTGMASLCRKDCFFNEDFLWCVRATERSEDMMQLKQWVRILGAGRI
>Pt-ITP-like
MVSQTCPLSLLALWMSVLAAAVLMQASVSSGARLEDKIYRFRLWPGTEREFQHYQCGAEFNKETRKLYNELSSVCEDCRNVYRYDPFLRQRCMSNCFDNDMFFKCTDQLMYPIEKIKDYEDMKMQIKA
>Pt-CHHR-like1
PTESTYFSCDKDPRLTTNFSQYEYEGRTTTWVPINTKVVIKLLAYIITFLVSIVGNLLVILVVRYNRTMRSSTNQYLVNLAVADLLVTLVCKLVHLIRHLSYPHYILPALVCKLDGFVQGTALAASVFTLTVISIRRFVAIMFPLHARTSPDRAIWVIAAVWIASALLSSPMLFYRELYGIEWSNFTTWHCDEFFPTERKMMNGVCVVTYDSKKLFYIIFTITCYFLPVTIMLVNYSLIVWKLWGAQQPGEHHQQQEATTRNTQRVVRMVTVVLLVFVVCWTPLQTLILYTSVGEKYEFMNMSDIEFTAYFVAHSNSALNPIIYCGFNANFRQGLVALLYCRHSRGGRVHYPRSWRGLTGTRDTTSGYSGPEPAVLVEMGSVRHTRLTQRGSTSSVGGR…
>Pt-CHHR-like2
MDCLTENLTNVSLAAPRNTSWLGGEDDWCERWRSGEPLVMGEKYPLLRTSVNYYLANLAVADLLITVTCWPTLVNRFTAPLYVLGRPLCKITVLALATCINVSVLTLAVVASGRLYAVLFPLRALRTSSRPVLLISLLWVASFVLALPSFYVRDTQAVKVSKDSASSIAAFRYYRILLLITMFFLPETVMVLAYSVIVVRLYCVRRGPKDHDTPLPTPLPASDHPHSAARRKVVKMTAAVVAAFTVCWSPLQALSLYGLLSEDTLPEWFSNAEFWAYFLGYCNSAFNPLLYCGCSENFRHGLTSLVLRRPRWRRKTRAGSANSWSPSTLLLRLTSSSLSRTSSGGGRGAVSRQTSNSLPSKTSDPARSSRKENSTTPSLLRSCSKGELVCPEHQLENNN…
>Pt-CHHR-like3
MKKLKATTKSPPLFSFPTDPENLSSVYECSQDSGLTANLSQFEYPYRMKTWVPITWREILKVATYLIVFLVSLVGNLLVMLVVCYNRHMRSSTNQYLVNLAAADLLVTLVCMWVHIVRHLSYPHYVLPAYVCKLDGFVQTTTLLASVLTLTVISVGRFVAVMFPLHARTSPDRANRVIAAVWIASALIACPILFYRKLYSIQWANFTTWQCDEFFPTEKEYVEDEGRCEVIYDAKNLFYTILIIALFFLPVAIMIINYSLVVWTLWGAKQPGEQQSAATRNMATKAKKRVVKMVTVVLLVFVICWTPLLTLILFSLNHQGHLPEWFSSLEFAAYFIAYSNSALNPIIYCGFNTSFRQGLVALLSCRHAATGRIYHRRHWMGMTGGTRDTTMGCSGPEPA…
>Pt-CHHR-like4
MASLGEGTLNCNDTCCQMSSGNVICFGDYNFTDRVNITHPEQWELALRWTYASIIMLLAVFGNLTIIIILAKNRILLRHSINCFILNMSVADLITALAGPIPFTIRDTAFFWVLGKAWCHLEGYIQMLVMLVSVTSLATISFDRMIGVIRPFHTHLKMWQCFVIIVIIWIVSAILAVPFGIYRIYTVHEWQDLTEVTCGEDAQKIQVWWMVSMIGLTWLPLLIMLGCYTTILVYFRSSEFRSRTNSEHPSITLMKRRVVIMMFIIVIAFTLFWLPFQIIKICGNSMFFGEDGQIKSPEAQKSYDILYTLCHYMMYTNVAVNPIIYALMHQTFRRALRVTFPCLYQRKSAFVLTPGLGRQHYVWSIRSTSNVYSDVMAMSRQNPEERRRRMRASSAVIGS…
>Pt-CHHR-like5
MVAQLDLEWEVSLGDEMVDPLSISCNLTCCKYSDDDDDVVCFSDLNFTEYKNLTTWAPWELAVRWTFASLIVLVAALANLTIIIILAKNRLLLRTSVNHFILNMSVADLTLALTGPIPFTIRDTSMFWPLGEAWCYLEGYIQMVVMLVSLESLATISCDRMMGVVRPFHTHLKTWQSLAIIIIIWVSSALLAVPWGLYRVYTIRMWKDRTETNCGEKETLYVWWMALVGLAWLSLAIMLVCYSTILAYFRHPSYKNVSKREHPVMTHLKKRVNYAALMTVSQYMIYVNPVVNPVIYGLLHQNFRRAFRLTFPCIFTRKSTLVLTRGQGVTRYMWSVRSTGSQPSVTGQHRHSSERQVQPYSPERNTTTPRRRLSGSETLSDEAQRNSHVSSKDERKRRK…
Eriocheir sinensis
>Es-CHH1-v1
MVAYRMTSTVALVVVVALGASILILPHAHARSAEGFGRMERLLGQLRGGADSSAALGELRVAVEGPAGHPLDKRQAYDRSCKGIYDRSLFSKLEHVCDDCFNLYRSSHVASGCRENCYSNLVFRQCMDDLLLMDMFDEYAKAIRVVGRKK
>Es-CHH1-v2
MVAYRMTSTVALVVVVALGASILILPHAHARSAEGFGRMERLLGQLRGGADSSAALGELRVAVEGPAGHPLDKRQAYDRSCKGIYDRSLFSKLEHVCDDCFNLYRSSHVASGCRRDCFDNDMFEYCVKDLLLENPEQLIRIRDAVRG
>Es-CHH2
MPGRNVTLTEAVMMVAVVLTLAAALFVSPASSSPVEPLSLRLDLRAQDPNDRKSDNPGSVEVDKRRWHHKRIRRSYVDGSCKGLYSRSVWDDLYNVCKECQNLYRISGLGKDCRRGCFASETFTMCLGDLFKPVDKYLTMAVSLRGS
>Es-MIH
MVSRAQSRFSSQRTWLVAAVVLAVLCSFGVQRAAAGIINAECPNMIGNRDIYKKVDWICEDCANIFRIDGLGMLCRKNCFRNIDFLWCVYASERHAQKDDLTRYVSILGQ
>Es-ITP-like
MVTQRRVFPVWVLLLAASLLAQNSVVSGAYSDPPLYKLWPGTHREFEHYKCTGEFHKANREHYSVLRKVCEDCTNVFRDNSQILPECMSNCFDNYTFLFCVKHTLRSDRLKDYLESRDEITV
>Es-CHHR-like1
MLMSNTCDANPLSFDFSQFEFPYRIDTWKPITWWEVLEIVAYIITFLVSIVGNILVILVVRYNRNMRSSTNQYLVNLAVADLLVTLVCKWVHLVRHLSHPHYVLPAILCKMEGFVQSIALVASVFTLTVISIGRFVAIMFPLHARTSPDRAIRVIAAVWIASALISSPPLLYRGLYKTEWSNFTTWNCDEFFPTKKKFVEGVGCVVTFDAKRLFYMVFIITCYFLPVTIMLVNYSLIVWKLWGAQQPGEQHQQQVAATRNMQRVVRMVTVVLVVFVICWTPLQSLMLYNFIYHEHLPEWPRWVEFTVYFVANSNSALNPIIYCGFNANFRQGLVALLTCRQTRSGSRTQYPSK
>Es-CHHR-like2
MIDIEARDLNCNETCCQMSSGNVMCFNEYNFTDRANITYPETWELALRWTYAPLIMLVAVLGNLAIIIILAKNRLLLRTSVNYFILNMSVADLITGLAGPIPFTIRDTAYFWVFGEAWCHLEGYIQVLVMMVSVTSLAVISCDRMMGVVRPFHNHIKPWQSIAIIFIIWTVSALLAVPFAVYRIYTVHHWQDLDETTCGEDVKKMHVWWMINMIGLTWLPLLVMIVCYTTILVYFRTHKFKASRNKEHPALTHLKRRVVLMMFVVVVAFTICWLPFQLLKICNNLFLDDNTQFKNEKARRSHDILLTLSHYMMYTNAAINPIIYALMHQTFRRAFRVTFPCFYNHKVIKIIWLSPPLPNSDLHMDSEWICS
>Es-CHHR-like3
MCAAPQSALGYHIAKFYWLADESVVAWNEWDDGEVMELQQLLTMMPRPNLTWPAVEGKELEDAFPVTCNLTCCQYSEDEIICFSEINYTDVNSLRTWPQWELAVRWTFASLVMLVAVLGNLTIIIILSKNRLLLRTSVNHFILNMSVADLILALTGPIPFTIRDTSMFWPLGELWCHLEGYIQMLVMLVSLASLATISFDRMMGVVRPFHTHLKTWHSLAIIVVIWGSSAVLALPWGLYRVFTVHIWKDCVQTICGENEKLYIWWMVAVVGLTWLPLAIMLISYSTILVYFRHPKFKNLSKREHPVMTHLKKRVVKMMFLVVVIFVVCWLPLQLLNIFYTSFLDENGQIKDEETEKYYNALVTVSQYMIYVNPAANPIIYGLLHQNFRRAFRLTFPCIF…
Paralithodes platypus MIHs
>Ppl-MIH1
MLTVSVVMVAVMLAGTARVVEGYGDSWHNIYECPGLVGNRHIYDKVVRVCDDCSNIFRKNDVGARCRSNCFQNDEFKNCLRVNERYDELHDFQRWISILRAGRK
>Ppl-MIH2
ALVVLAVTLALVTLPAQARFPTDDCPGMVGNREVYSKVSWICEDCANLFRDNSIGVNCRKNCFINEDFSTCVKATERHHEIEQLKRWVSILGAGRR
Cherax quadricarinatus MIHs
>Cqu-MIH1
MVKHANQSCSALRPWLIVMVVGLLVHQTTPTLTDDCPGAMGNRHIHTMLLRVCGDCYNVLRDPEIEVDCRSGCFTSDTFKSCLELIERGDEFFDFMRRVGILNAGGK
>Cqu-MIH2
MGNQKSECFYARRVWLLVLIALVVQQSTARFIEDDCPGVVGNRNVHSMVMRVCEDCYNVFRHPEVAVGCRRACFSSKMFKSCLSALQREEEYPDFLRLIGILNAGRK
Macrobrachium nipponense MIHs
>Mni-MIH1
MASRLNKAFTLQKLTYVAITMAVFGILLVDQTSARFLDDECRGVMGNRDLYEYVVRICDDCENIFRKSNVGPKCKKNCFYNMDFMWCVHATERTDELEHLNRAMSIIRVGRK
>Mni-MIH2
MSTQKHLQGMVNLTAQGISAQRVLVTAPVIISLFLVSGTSARYLDDECPGVMGNRDLYEKVVRVCDDCSNIFRMNDMGTRCRKDCFYNVDFLWCVYATERHGDVEQLNRWMSILRAGRK
Penaeus vannamei MIHs
>ROT81026.1
MRTWLVVILVVVGTSLFFDTASASLIHGTCRGVMGNREIYEKVVRVCEDCTNIFRMPGLDGMCRDRCFYNEWFLLCLKAANREDEIENFRVWISILNAGQ
>ROT81027.1
MRTWLALVIVLVGTSLFVDTASASFTDGACRGIMGNREIYKKVERVCEDCTNIFRLPGLDGMCRDRCFYNEWFLLCLKAANREDEIENFRVWISILNA
>ROT81028.1
MYRPVIRIWLALVIAVVGASIFFDSASASFIDGSCRGVMGNREIYKKVVRVCEDCTNIFRLPGLDVMCRDRCFHNEWFLLCLNAANREDEIENFKVWISILSAGQ
>ROT81029.1
MYHLAIRTWLAIVLVMVGISLFFDTASALFMDGSCRGLMGNRDIYKKVVRVCEDCTNIFRLPGLDGLCRNRCFYNEWFLVCLKAANREGEIENFRVWVSILSA
>ROT81030.1
MGGTCPGRMGNREMYTKVDRVCEDCANIFRLPVLEGLCRDRCFYNEWFLLCLKAANREDEIENFRVWISILNA
>ROT81031.1
MYRLAIRSWLPVMTVLFATSLFFDTASASPIDGTCPGRMGNREIYKKVDSVCKDCVNIFRLPELEGLCRDECFINDWFLFCAKAAKRMDEIENFRVWISILNA
Penaeus monodon MIHs
>XP_037793623.1
MRCLAMIVSFFSLQRTWLAIMVILSGTSLFSIASANLTEGTCRGRMGNREIYKKVDRVCEDCANIFRLPGLEGLCRDRCFYNEWFLLCLKAANREDEIENFRVWISILNA
>XP_037793624.1
MRCLAMRTWLAIMVILSGTSLFSIASANLTEGTCRGRMGNREIYKKVDRVCEDCANIFRLPGLEGLCRDRCFYNEWFLLCLKAANREDEIENFRVWISILNA
>XP_037793625.1
MHRLALRTWLAIMIVLFATSLSSIASAGLTDGTCRGRMGNREIYKKVDRVCEDCANIFRLPGLEGLCRDRCFYNEWFLLCLKAANREDEIENFRVWISILNA
>XP_037793626.1
MRCLAMRTWLAMMIVLFATSLPSIASDSLTVGTCRGRMGNREIYKKVDRVCEDCANIFRLPGLEGLCRDRCFYNEWFLLCLKAANREDEIENFRVWISILNA
>XP_037793627.1
MRCLAMRTWLAMMIVLFATSLPSIASDSLTVGTCRGRMGNREIYKKVDRVCEDCANIFRLPGLEGLCRDRCFYNEWFLLCLKAANREDEIENFRVWISILNA
>XP_037793628.1
MRCLAMRTWLAIMVILSGTSLFSIASANLTEGTCRGRMGNREIYKKVDRVCEDCANIFRLPGLEGLCRDRCFYNEWFLLCLKAANREDEIENFRVWISILNA
>XP_037793630.1
MRIVPSSSQDTGHFSPKTTRVMASPRGTSGIFKKACQVVLVAAALSGLLSSPASARFIDDECVGAMGNRNIYEKVSRVCDDCSNIFRLPNVGESCRRNCFYNEDFLWCIMASERHAEVEQFNRWISILKAGRK
>XP_037793631.1
MYRLAMRTWLAIMIVLFGTSLFFDIASASLTDGTCRGRMGNREIYKKVDRVCEDCANIFRLPGLEGLCRDRCFYNEWFLLCLKAANREDEIENFRVWVSILNA
>XP_037793632.1
MHRLALRTWLAIMIVLFATSLSSIASAGLTDGTCRGRMGNREIYKKVDRVCEDCANIFRLPGLEGLCRDRCFYNEWFLLCLKAANREDEIENFRVWISILNA
>XP_037793633.1
MYHLAIRIWLVVVIVLFGIASGSLMDGTCRGRMGNREIYNKVDRVCEDCVNIFRLPGLEGLCRDRCFYNEWFLLCLKAANREDEIENFRVWISILNA
>XP_037793634.1
MKTWLLLATLAVGASLANILDSKCRGAMGNRDMYNKVERVCEDCTNIYRLPQLDGLCRNRCFNNQWFLMCLHSAKREAELEHFRLWISILNAGRPW
>XP_037793635.1
MHRLARRTLLAIVIVLFGTNLFFDIASASLIEGTCRGRMGNREIYKKVDRFVKTGANIFRLPELEGLCRDRCFYNEWFLLCLKAANRDDEIENFRVWISILNA
>XP_037793905.1
MHRLAMRTLLAIVIVLFGTNLFFDIASASLIEGTCRGRMGNREIYKKVDRVCEDCANIFRLPELEGLCRDRCFYNEWFLLCLKAANREDEIENFRVWISILNA

## Sheet: Scylla paramamosain TPM
eyestalk	female	female	female	male	male	male
Sp-CHH1-v1	1543.9	836.334	1565.07	2927.31	283.81	1683.65
Sp-CHH1-v2	11.1314	4.55325	9.69887	14.2933	3.67127	15.8161
Sp-CHH2	162.075	168.749	305.448	150.793	111.701	130.606
Sp-MIH	1030.82	1388.01	1399.46	1936.52	76.1816	2682.15
Sp-VIH	1113.26	1378.7	1311.86	1999.51	108.116	2474.48
Sp-ITP-like	20.3896	23.876	10.7757	14.2914	7.80712	26.6081
Sp-GPCR-A34	0	0	0	0	0	0
Sp-GPCR-A35	119.791	110.49	83.8335	76.7985	51.6941	67.1787
Sp-GPCR-A36	0	0	0	0	0	0
Sp-GPCR-A37	0	0	0	0	0	0
PRJNA306601_cerabral	SRR3086589	SRR3086590	SRR3086592
Sp-CHH1-v1	0	0	0
Sp-CHH1-v2	1372.23	876.694	1380.14
Sp-CHH2	35.9831	21.3333	9.07076
Sp-MIH	0	1.26727	0
Sp-VIH	0	0	0
Sp-ITP-like	0	0	0
Sp-GPCR-A34	0	0	0
Sp-GPCR-A35	51.9236	55.5975	36.6812
Sp-GPCR-A36	0	0	0
Sp-GPCR-A37	0	0	0
	pre-vitellogenic stage	early vitellogenic stage	late vitellogenic stage
PRJNA681094_gill	SRR13154309	SRR13154310	SRR13154303	SRR13154300	SRR13154301	SRR13154302	SRR13154297	SRR13154298	SRR13154299	SRR13154296	SRR13154307	SRR13154308	SRR13154304	SRR13154305	SRR13154306
Sp-CHH1-v1	0	0	0	0	0	0	0	0	0	0	0	0	0	0	0
Sp-CHH1-v2	21.8687	78.9244	2.87065	2.10363	8.71579	130.483	11.8224	95.7127	43.697	99.3001	499.089	506.663	2.96965	139.052	1.7064
Sp-CHH2	2.25947	4.86376	1.21759	2.34493	2.5741	5.64914	6.27851	2.38717	1.67913	7.24713	60.4049	9.27733	1.02093	2.81138	10.4489
Sp-MIH	0	0	0	0	0	0	0.43417	0	0	0	0	0	0	0.455208	1.30597
Sp-VIH	0	0	0	0	0	0	0	0	0	0	0	0	0	0	0
Sp-ITP-like	0	0	0	0	0	0	0	0	0	0	0	0	0.462728	0.254205	0
Sp-GPCR-A34	0	0	0	0	0	0	0	0	0	0	0	0	0	0	0
Sp-GPCR-A35	0.628315	1.39688	0.646983	0.49501	1.22496	0.213677	0.461654	0.228526	0.670117	1.51124	0.220282	5.5469	0.885212	2.16512	0.685352
Sp-GPCR-A36	0	0	0	0	0	0	0	0	0	0	0	0	0	0.043132	0
Sp-GPCR-A37	0	0	0	0	0	0	0	0	0	0	0	0	0	0	0
	control	control	control	low-salinity (6 hours)	low-salinity (6 hours)	low-salinity (6 hours)	low-salinity (10 days)	low-salinity (10 days)	low-salinity (10 days)	high-salinity (6 hours)	high-salinity (6 hours)	high-salinity (6 hours)	high-salinity (10 days)	high-salinity (10 days)	high-salinity (10 days)
PRJNA617953_hp_molt	SRR11454481	SRR11454482	SRR11454483	SRR11454484	SRR11454485	SRR11454486	SRR11454487	SRR11454488	SRR11454489
Sp-CHH1-v1	0	0	0	0	0	0	0	0	0
Sp-CHH1-v2	5.96859	1.36384	14.4684	0.738788	15.1415	5.31307	220.595	485.984	4.3421
Sp-CHH2	0.665613	8.15294	0.24826	0.470255	0.032997	0.359456	20.6615	36.9105	0.267848
Sp-MIH	0	0	0	0	0	0	0	0	0
Sp-VIH	0	0	0	0.398944	0	0	0	0	0
Sp-ITP-like	0	0	0	0	0	0	0	0	0
Sp-GPCR-A34	2.21288	0	0.421831	1.5201	0	1.68058	21.799	38.6826	12.7202
Sp-GPCR-A35	1.25379	1.44803	2.72915	4.59789	2.16473	1.34729	3.54387	8.07282	1.30165
Sp-GPCR-A36	10.4361	10.6215	12.0373	9.42656	6.33743	6.49146	10.1472	15.9597	8.54174
Sp-GPCR-A37	4.13232	0.663238	4.39609	2.56864	0.165667	1.47726	1.03116	0.602531	0.957526
hepatopancreas	Inter-molt stage	Inter-molt stage	Inter-molt stage	Pre-molt stage	Pre-molt stage	Pre-molt stage	Post-molt stage	Post-molt stage	Post-molt stage
PRJNA640877_hp_omso	SRR12094707	SRR12094708	SRR12094709	SRR12094710	SRR12094711	SRR12094712		differential expression
Sp-CHH1-v1	0	0	0	0	0	0		transcript_id	sampleA	sampleB	logFC	logCPM	PValue	FDR
Sp-CHH1-v2	3.87188	0	3.67239	522.156	1675.65	453.331		Sp-CHH1-v2	control	low-salinity	7.87898	6.73126	4.43152e-18	7.5493e-16
Sp-CHH2	1.5839	0.547683	2.86108	43.8312	515.104	460.743		Sp-CHH2	control	low-salinity	7.35974	8.44895	2.4515e-12	1.72618e-10
Sp-MIH	0	0	0	0	0	0		Sp-GPCR-A36	control	low-salinity	1.47622	5.55679	0.0023531	0.0173557
Sp-VIH	0	0	0	0	0	0
Sp-ITP-like	0	0	0	0	0	0
Sp-GPCR-A34	0.85008	0	0	5.13833	5.29807	6.14627
Sp-GPCR-A35	0	0	0	2.5957	1.64129	1.60603
Sp-GPCR-A36	24.6281	17.0232	22.3432	61.446	90.0819	93.5662
Sp-GPCR-A37	17.7588	7.66715	8.16819	11.8803	21.8842	28.4817
hepatopancreas	control（25‰）	control（25‰）	control（25‰）	low-salinity (4‰)	low-salinity (4‰)	low-salinity (4‰)
PRJNA380738_gonad	SRR8749191	SRR8749192	SRR8749199	SRR8749197	SRR8749198	SRR8749200
Sp-CHH1-v1	0	0	0	0	0	0
Sp-CHH1-v2	29.5827	11.2666	111.632	2.37405	1.92511	32.9092
Sp-CHH2	69.4602	79.7478	110.712	5.45371	16.5446	20.9196
Sp-MIH	1.72703	1.30281	3.36609	0	0.172963	0
Sp-VIH	3.22282	3.65476	5.11635	0	0	0
Sp-ITP-like	0.716793	0.642626	0	0.118909	0.957089	0.182645
Sp-GPCR-A34	1.69246	1.60826	0	0	0.626393	0.847654
Sp-GPCR-A35	13.4547	12.0602	10.1774	4.86998	10.2885	14.652
Sp-GPCR-A36	1.41844	0.747061	1.05123	0	0	0
Sp-GPCR-A37	68.4815	10.3367	10.4061	0	0	0
	adult testies	adult testies	adult testies	adult ovary	adult ovary	adult ovary
follicular_oocytes	follicular	follicular	follicular	oocytes	oocytes	oocytes		differential expression
Sp-CHH1-v1	0	0	0	0	0	0		transcript_id	sampleA	sampleB	logFC	logCPM	PValue	FDR
Sp-CHH1-v2	1437.27	361.77	357.83	4.31943	0.623943	0.641161		Sp-CHH1-v2	follicular	oocytes	7.67729	6.50462	1.68569e-19	7.96761e-18
Sp-CHH2	89.8598	13.5911	13.5911	10.3969	2.87335	0.693792		Sp-CHH2	follicular	oocytes	2.40418	5.63716	0.00288206	0.00717659
Sp-MIH	0	0	0	0	0	0
Sp-VIH	0	0	0	0	0	0
Sp-ITP-like	0	0	0	0	0.192722	0.260736
Sp-GPCR-A34	1.08743	0	0	0	0	0
Sp-GPCR-A35	5.80433	0.527297	0.979948	0.673583	1.03512	0
Sp-GPCR-A36	0	0	0	0	0	0
Sp-GPCR-A37	0	0	0	0	0	0		The thresholds for differentially expressed genes (DEGs) were logFC > 1 and p-value < 0.01.

## Sheet: Portunus trituberculatus TPM
PRJNA360888 & PRJNA707143_eyestalk	SRR5166964	SRR5166966	SRR5166968	SRR13870346
Pt-CHH1-v1	81.2622	127.105	102.436	151.258																					Pt-CHHR-like1											4.80028	1.29207	6.9463	7.71821	12.9301
Pt-CHH1-v2	1.7951	1.25143	2.06951	0																				eyestalk ganglia	8.2871	13.2456	4.97229	4.54709	8.14745	26.8992						4.70524
Pt-CHH2	30.4609	11.7199	70.7207	456.852																				cerebral ganglia	11.4112	15.9913										0.125221	0	0	0	0	0	0
Pt-MIH	82.2075	98.6411	61.202	142.843																				hepatopancreas	0.124027	0	4.00799	0.877581	0	0.10934	0	0				3.00666
Pt-ITP-like	43.2273	12.6919	12.4028	5.6253																				mandibular organ	1.01058	0.603532										0.400815	0	0	0	0	0	0.484158	0.120169	0	0
Pt-CHHR-like1	4.97229	4.54709	8.14745	26.8992																				ovary	0.181729	0.147781	0.080122	0	0	2.37244	2.10027	0.863201	2.18929	2.36414	2.09328
Pt-CHHR-like2	0	0	0	0																				testis	0.084064
Pt-CHHR-like3	1.29207	6.9463	7.71821	12.9301
Pt-CHHR-like4	0	0	0	0																					Pt-CHHR-like2
Pt-CHHR-like5	0	0	0.19583	0																					0	0	0	0	0	0
	PoM2(eyestalk)	PrM2(eyestalk)	InM2(eyestalk)	eyestalk																					0	0
																									0	0.340684	0	2.21695	0	0	0	3.68398
PRJNA532740	SRR8897547	SRR8897548	SRR8897549	SRR8897550	SRR8897551	SRR8897552	SRR8897553	SRR8897554	SRR8897555	SRR8897556															0	0
Pt-CHH1-v1	2.2894	303.395	0	1.05249	0.086155	1.4764	0	0	6.32856	2.56409															0	0.131221	0	1.06796	0.69326	2.21677	0.956755	0	0	2.20902	0.953571
Pt-CHH1-v2	0	0	0	0	0	0	0	0	0	0															0
Pt-CHH2	8.23222	215.441	87.1621	65.021	0.275323	0	12.9437	0	84.7592	19.4213
Pt-MIH	0	202.009	0.330546	0.215949	0.301504	0.567375	0.975225	0	0.27414	0.186822															Pt-CHHR-like3
Pt-ITP-like	0.332175	113.963	2.34311	0.232149	0.083952	0.176262	0	0.094941	0.516995	0.052448															5.31879	4.80028	1.29207	6.9463	7.71821	12.9301
Pt-CHHR-like1	8.2871	13.2456	0.181729	0.147781	1.01058	0.603532	0.124027	0	11.4112	15.9913															5.45889	4.70524
Pt-CHHR-like2	0	0	0	0.131221	0	0	0	0.340684	0	0															0	0.125221	0	0	0	0	0	0
Pt-CHHR-like3	5.31879	4.80028	0.840111	0.400815	3.45525	3.00666	0	0.125221	5.45889	4.70524															3.45525	3.00666
Pt-CHHR-like4	0.38112	0	0.547602	0	0	0	4.0694	17.3075	0	0															0.840111	0.400815	0	0	0	0	0	0.484158	0.120169	0	0
Pt-CHHR-like5	0.090676	0	0.959098	0.221767	0.0678	0	6.51482	11.624	0	0.116572															0.185538
	SG2(eyestalk)	SG1(eyestalk)	O2(ovary)	O1(ovary)	MO2(mandibular organ)	MO1(mandibular organ)	H1(hepatopancreas)	H2(hepatopancreas)	BG1(cerebral)	BG2(cerebral)
																									Pt-CHHR-like4
PRJNA597187 & PRJNA266070	SRR1920180	SRR1920182	SRR10757128	SRR10757129	SRR10757130	SRR10757131	SRR10757132	SRR10757133	SRR10757134	SRR10757135	SRR10757136	SRR10757137	SRR10757138	SRR10757139	SRR10757140	SRR10757141									0.38112	0	0	0	0	0
Pt-CHH1-v1	5.30435	0	0.061582	0	4.48382	0.228476	0.438328	0	0	0	0	0.459445	0	0.227677	0.436869	1.15205									0	0
Pt-CHH1-v2	3.19353	0	0	0	0	0	0	0.458387	0	0	0	0	0	0	0	0									4.0694	17.3074	29.7856	34.6106	2.83111	2.99994	0	35.8049
Pt-CHH2	26.5115	67.9371	18.9361	8.06207	3.31994	35.1954	30.5354	17.5923	0	9.97159	0	0	0	35.0723	30.9031	1.91483									0	0
Pt-MIH	0.669291	0	0	0	64.5201	0	0	0	0	0	0	0	0	0	0	0									0.547602	0	0	0	0	0	0	0.338823	0	0	0
Pt-ITP-like	0.207586	0.310523	0	0	2.91933	0	0	0.475685	0	0	0	0	0	0	0	0.930306									0
Pt-CHHR-like1	0.084064	0.080122	0	0	4.00799	2.37244	2.10027	0.863201	0.877581	2.18929	0	0.10934	0	2.36414	2.09328	0
Pt-CHHR-like2	0	0	1.06796	0.69326	0	2.21677	0.956755	0	2.21695	0	0	0	0	2.20902	0.953571	3.68398									Pt-CHHR-like5
Pt-CHHR-like3	0.185538	0	0	0	0	0	0	0.484158	0	0.120169	0	0	0	0	0	0									0.090676	0	0	0	0.19583	0
Pt-CHHR-like4	0	0	0	0	29.7856	0	0	0.338823	34.6106	0	2.83111	2.99994	0	0	0	35.8049									0	0.116572
Pt-CHHR-like5	0.42882	0	0	0	63.0111	0	0	1.80232	32.421	1.59647	14.299	16.0582	13.5393	0	0	53.4345									6.51482	11.624	63.0111	32.4211	14.299	16.0582	13.5393	53.4345
	testis	ovary	ERRi_O2(ovary)	ERRi_O1(ovary)	ERRi_H3(hepatopancreas)	GFP_O3(ovary)	GFP_O3(ovary)	GFP_O2(ovary)	ERRi_H2(hepatopancreas)	GFP_O1(ovary)	GFP_H3(hepatopancreas)	GFP_H2(hepatopancreas)	GFP_H1(hepatopancreas)	ERRi_O3(ovary)	ERRi_O3.R1(ovary)	ERRi_H1.R1(hepatopancreas)									0.0678	0
																									0.959098	0.221767	0	0	0	0	0	1.80232	1.59647	0	0
																									0.42882

## Sheet: Eriocheir sinensis TPM
PRJNA271233_hepatopancreas	SRR1735503	SRR1735536	SRR1735537
Es-CHH1-v1	0	0	0
Es-CHH1-v2	0	0	0
Es-CHH2	1.21931	0.740578	0
Es-MIH	0	0	0
Es-ITP-like	0.156755	0.265162	0.271207
Es-CHHR-like1	3.01266	1.07404	2.41391
Es-CHHR-like2	50.5874	5.45144	19.0558
Es-CHHR-like3	86.7904	11.7626	14.6725
	postmolt	intermolt	premolt
PRJNA488872	SRR7777398	SRR7777399	SRR7777400	SRR7777401	SRR7777402	SRR7777403	SRR7777404	SRR7777405	SRR7777406	SRR7777407	SRR7777408	SRR7777409
Es-CHH1-v1	1.01061	0.517827	0.370352	478.217	0.472319	1.04901	2135.87	1.56331	763.042	1.06869	0.894078	960.067
Es-CHH1-v2	0	0	0	0.098949	0	0	0	0	0	0	0	0
Es-CHH2	41.4763	5.84222	2.56997	43.0623	7.03653	27.0215	3.1466	1.49542	9.55566	2.57875	1.84329	99.087
Es-MIH	0.606841	0	0.566173	246.29	0.801464	1.57974	1332.68	0.261725	717.104	1.02606	1.12644	632.898
Es-ITP-like	0	0	0.454067	74.8606	0	0	355.716	0	167.854	0.168178	0	149.473
Es-CHHR-like1	0.502341	2.31227	2.08979	4.1224	0.783394	0.336037	2.63055	0	3.1695	1.06039	0.322993	2.93036
Es-CHHR-like2	34.1381	0	0	0.175655	27.1605	3.2891	0.102871	5.30788	0	25.1096	0	0
Es-CHHR-like3	150.043	0.5003	0.787099	0.052103	60.5081	7.66659	0.253692	23.1703	0.048955	30.3313	0.086967	0.07758
	Crab_Nor_Mature_Hp	Ovary of normal crab	Ovary of precocious crab	Eyestalk of normal crab	Hepatopancreas of precocious crab	Ovary of precocious crab	Eyestalk of precocious crab	Hepatopancreas of precocious crab	Eyestalk of precocious crab	Hepatopancreas of precocious crab	Ovary of precocious crab	Eyestalk of precocious crab
PRJNA488907_gill	SRR7777769	SRR7777770	SRR7777771
Es-CHH1-v1	0	0	0.056974
Es-CHH1-v2	0	0	0
Es-CHH2	31.4717	15.8361	137.586
Es-MIH	0	0	0
Es-ITP-like	0.139595	0	0.170685
Es-CHHR-like1	5.03387	2.75445	3.13899
Es-CHHR-like2	0	0.204278	0.350752
Es-CHHR-like3	0	0.150877	0.500716
	Crab_sea_to_freshwater	Crab-freshwater	Crab_fresh_to_seawater
PRJNA577481	SRR10276365	SRR10276366	SRR10276367	SRR10276369
Es-CHH1-v1	2.12816	0	0.089459	494.341
Es-CHH1-v2	0	0	0	0
Es-CHH2	1.22405	20.234	7.71643	24.5702
Es-MIH	2.38598	0	0	121.447
Es-ITP-like	0	0	0.379989	13.9181
Es-CHHR-like1	0.88438	6.33334	1.90039	17.3779
Es-CHHR-like2	3.96606	0	22.1979	0.155487
Es-CHHR-like3	6.89003	0	101.608	0.143877
	Es_S gill	Es_M musle	Es_H(hepatopancreas)	Es_E(eyestalk)
PRJNA577509	SRR10276537	SRR10276538	SRR10276539	SRR10276540	SRR10276541	SRR10276542	SRR10276543	SRR10276544	SRR10276545	SRR10276546	SRR10276547	SRR10276548
Es-CHH1-v1	0	0.08572	2.01494	5.89766	0	0	0	0	5.12549	6.52797	0	3.71955
Es-CHH1-v2	0	0	0.379564	1.53117	0	0	0	0	2.96661	0	0	0
Es-CHH2	8.68792	9.01571	10.7455	5.91079	0.437977	5.19802	1.4095	3.7717	10.8629	5.2663	7.05654	31.4523
Es-MIH	0	0	2.31656	2.54422	0	0	0	0	1.43827	1.53954	0	0.657141
Es-ITP-like	0	0	1.09513	1.40211	0	0.797788	0	0	0.823584	0.225637	0	1.26351
Es-CHHR-like1	9.04705	10.733	1.93165	3.10521	10.2826	9.52733	4.38464	9.7014	1.99375	3.26967	8.06317	8.03466
Es-CHHR-like2	0	0	8.77382	10.9621	0	0	0	0	4.17933	9.65558	0	0
Es-CHHR-like3	0	0	5.34945	2.70478	0	0	0	0	3.56536	3.54239	0	0
	KDT_A2(AG)	KDT_A1(AG)	KDC_T2(testis)	KDC_T1(testis)	KDC_A2(AG)	KDC_A1(AG)	EAT_A2(AG	EAT_A1(AG	KDT_T2(testis)	KDT_T1(testis)	EAC_A2(AG)	EAC_A1(AG)
PRJNA643225_YO	SRR12118256	SRR12118257
Es-CHH1-v1	0	0
Es-CHH1-v2	0	0
Es-CHH2	37.227	22.8558
Es-MIH	0	0
Es-ITP-like	0	0
Es-CHHR-like1	0	0
Es-CHHR-like2	0	0
Es-CHHR-like3	0	0
	Y-organ C0	Y-organ C1

## Sheet: Summry TPM of Figure 6
Spa-chh1-v1
eyestalk	1543.9	836.334	1565.07	2927.31	283.81	1683.65
cerebral	0	0	0
gill	0	0	0	0	0	0	0	0	0	0	0	0	0	0	0
hepatopancreas	0	0	0	0	0	0	0	0	0	0	0	0	0	0	0
testies	0	0	0
follicular cells	0	0	0
oocytes	0	0	0
Spa_chh1_v2
eyestalk	11.1314	4.55325	9.69887	14.2933	3.67127	15.8161
cerebral	1372.23	876.694	1380.14
gill	21.8687	78.9244	2.87065	2.10363	8.71579	130.483	11.8224	95.7127	43.697	99.3001	499.089	506.663	2.96965	139.052	1.7064
hepatopancreas	5.96859	1.36384	14.4684	0.738788	15.1415	5.31307	220.595	485.984	4.3421	3.87188	0	3.67239	522.156	1675.65	453.331
testies	29.5827	11.2666	111.632
follicular cells	1437.27	361.77	357.83
oocytes	4.31943	0.623943	0.641161
Sp-CHH2
eyestalk	162.075	168.749	305.448	150.793	111.701	130.606
cerebral	35.9831	21.3333	9.07076
gill	2.25947	4.86376	1.21759	2.34493	2.5741	5.64914	6.27851	2.38717	1.67913	7.24713	60.4049	9.27733	1.02093	2.81138	10.4489
hepatopancreas	0.665613	8.15294	0.24826	0.470255	0.032997	0.359456	20.6615	36.9105	0.267848	1.5839	0.547683	2.86108	43.8312	515.104	460.743
testies	69.4602	79.7478	110.712
follicular cells	89.8598	13.5911	13.5911
oocytes	10.3969	2.87335	0.693792
Sp-MIH
eyestalk	1030.82	1388.01	1399.46	1936.52	76.1816	2682.15
cerebral	0	1.26727	0
gill	0	0	0	0	0	0	0.43417	0	0	0	0	0	0	0.455208	1.30597
hepatopancreas	0	0	0	0	0	0	0	0	0	0	0	0	0	0	0
testies	1.72703	1.30281	3.36609
follicular cells	0	0	0
oocytes	0	0	0
Sp-VIH
eyestalk	1113.26	1378.7	1311.86	1999.51	108.116	2474.48
cerebral	0	0	0
gill	0	0	0	0	0	0	0	0	0	0	0	0	0	0	0
hepatopancreas	0	0	0	0.398944	0	0	0	0	0	0	0	0	0	0	0
testies	3.22282	3.65476	5.11635
follicular cells	0	0	0
oocytes	0	0	0
Sp-ITP-like
eyestalk	20.3896	23.876	10.7757	14.2914	7.80712	26.6081
cerebral	0	0	0
gill	0	0	0	0	0	0	0	0	0	0	0	0	0.462728	0.254205	0
hepatopancreas	0	0	0	0	0	0	0	0	0	0	0	0	0	0	0
testies	0.716793	0.642626	0
follicular cells	0	0	0
oocytes	0	0.192722	0.260736
Sp-GPCR-A34
eyestalk	0	0	0	0	0	0
cerebral	0	0	0
gill	0	0	0	0	0	0	0	0	0	0	0	0	0	0	0
hepatopancreas	2.21288	0	0.421831	1.5201	0	1.68058	21.799	38.6826	12.7202	0.85008	0	0	5.13833	5.29807	6.14627
testies	1.69246	1.60826	0
follicular cells	1.08743	0	0
oocytes	0	0	0
Sp-GPCR-A35
eyestalk	119.791	110.49	83.8335	76.7985	51.6941	67.1787
cerebral	51.9236	55.5975	36.6812
gill	0.628315	1.39688	0.646983	0.49501	1.22496	0.213677	0.461654	0.228526	0.670117	1.51124	0.220282	5.5469	0.885212	2.16512	0.685352
hepatopancreas	1.25379	1.44803	2.72915	4.59789	2.16473	1.34729	3.54387	8.07282	1.30165	0	0	0	2.5957	1.64129	1.60603
testies	13.4547	12.0602	10.1774
follicular cells	5.80433	0.527297	0.979948
oocytes	0.673583	1.03512	0
Sp-GPCR-A36
eyestalk	0	0	0	0	0	0
cerebral	0	0	0
gill	0	0	0	0	0	0	0	0	0	0	0	0	0	0.043132	0
hepatopancreas	10.4361	10.6215	12.0373	9.42656	6.33743	6.49146	10.1472	15.9597	8.54174	24.6281	17.0232	22.3432	61.446	90.0819	93.5662
testies	1.41844	0.747061	1.05123
follicular cells	0	0	0
oocytes	0	0	0
Sp-GPCR-A37
eyestalk	0	0	0	0	0	0
cerebral	0	0	0
gill	0	0	0	0	0	0	0	0	0	0	0	0	0	0	0
hepatopancreas	4.13232	0.663238	4.39609	2.56864	0.165667	1.47726	1.03116	0.602531	0.957526	17.7588	7.66715	8.16819	11.8803	21.8842	28.4817
testies	68.4815	10.3367	10.4061
follicular cells	0	0	0
oocytes	0	0	0
These TPM values were extracted from "Scylla paramamosain TPM" sheet.
Pt-CHH1-v1
eyestalk ganglia	81.2622	127.105	102.436	151.258	2.2894	303.395
cerebral ganglia	6.32856	2.56409
hepatopancreas	0	0	4.48382	0	0	0.459445	0	1.15205
mandibular organ	0.086155	1.4764
ovary	0	1.05249	0	0.061582	0	0.228476	0.438328	0	0	0.227677	0.436869
testis	5.30435
Pt-CHH1-v2
eyestalk ganglia	1.7951	1.25143	2.06951	0	0	0
cerebral ganglia	0	0
hepatopancreas	0	0	0	0	0	0	0	0
mandibular organ	0	0
ovary	0.458387	0	0	0	0	0	0	0	0	0	0
testis	3.19353
Pt-CHH2
eyestalk ganglia	30.4609	11.7199	70.7207	456.852	8.23222	215.441
cerebral ganglia	84.7592	19.4213
hepatopancreas	12.9437	0	3.31994	0	0	0	0	1.91483
mandibular organ	0.275323	0
ovary	0	0.131221	67.9371	18.9361	8.06207	35.1954	30.5355	17.5923	9.97159	35.0723	30.9031
testis	26.5115
Pt-MIH
eyestalk ganglia	82.2075	98.6411	61.202	142.843	0	202.009
cerebral ganglia	0.27414	0.186822
hepatopancreas	0.975225	0	64.5201	0	0	0	0	0
mandibular organ	0.301504	0.567375
ovary	0.330546	0.215949	0	0	0	0	0	0	0	0	0
testis	0.669291
Pt-ITP-like
eyestalk ganglia	0.332175	113.963	43.2273	12.6919	12.4028	5.6253
cerebral ganglia	0.516995	0.052448
hepatopancreas	0	0.094941	2.91933	0	0	0	0	0.930306
mandibular organ	0.083952	0.176262
ovary	2.34311	0.232149	0.310523	0	0	0	0	0.475685	0	0	0
testis	0.207586
Pt-CHHR-like1
eyestalk ganglia	8.2871	13.2456	4.97229	4.54709	8.14745	26.8992
cerebral ganglia	11.4112	15.9913
hepatopancreas	0.124027	0	4.00799	0.877581	0	0.10934	0	0
mandibular organ	1.01058	0.603532
ovary	0.181729	0.147781	0.080122	0	0	2.37244	2.10027	0.863201	2.18929	2.36414	2.09328
testis	0.084064
Pt-CHHR-like2
eyestalk ganglia	0	0	0	0	0	0
cerebral ganglia	0	0
hepatopancreas	0	0.340684	0	2.21695	0	0	0	3.68398
mandibular organ	0	0
ovary	0	0.131221	0	1.06796	0.69326	2.21677	0.956755	0	0	2.20902	0.953571
testis	0
Pt-CHHR-like3
eyestalk ganglia	5.31879	4.80028	1.29207	6.9463	7.71821	12.9301
cerebral ganglia	5.45889	4.70524
hepatopancreas	0	0.125221	0	0	0	0	0	0
mandibular organ	3.45525	3.00666
ovary	0.840111	0.400815	0	0	0	0	0	0.484158	0.120169	0	0
testis	0.185538
Pt-CHHR-like4
eyestalk ganglia	0.38112	0	0	0	0	0
cerebral ganglia	0	0
hepatopancreas	4.0694	17.3074	29.7856	34.6106	2.83111	2.99994	0	35.8049
mandibular organ	0	0
ovary	0.547602	0	0	0	0	0	0	0.338823	0	0	0
testis	0
Pt-CHHR-like5
eyestalk ganglia	0.090676	0	0	0	0.19583	0
cerebral ganglia	0	0.116572
hepatopancreas	6.51482	11.624	63.0111	32.4211	14.299	16.0582	13.5393	53.4345
mandibular organ	0.0678	0
ovary	0.959098	0.221767	0	0	0	0	0	1.80232	1.59647	0	0
testis	0.42882
These TPM values were extracted from "Portunus trituberculatus TPM" sheet.
	Es-CHH1-v1								Es-CHH1-v2								Es-CHH2								Es-MIH								Es-ITP-like								Es-CHHR-like1								Es-CHHR-like2
eyestalk ganglia	494.341	478.217	2135.87	763.042	960.067				0	0.098949	0	0	0				24.5702	43.0623	3.1466	9.55566	99.087				121.447	246.29	1332.68	717.104	632.898				13.918	74.8606	355.716	167.855	149.473				17.3779	4.1224	2.63055	3.1695	2.93036				0.155487
gill	2.12816	0	0	0.056974					0	0	0	0					1.22405	31.4717	15.8361	137.586					2.38598	0	0	0					0	0.139595	0	0.170685					0.88438	5.03387	2.75445	3.13899					3.96606
hepatopancreas	0	0	0	1.01061	0.472319	1.56331	1.06869	0.089459	0	0	0	0	0	0	0	0	1.21931	0.740578	0	41.4763	7.03653	1.49542	2.57875	7.71643	0	0	0	0.606841	0.801464	0.261725	1.02606	0	0.156755	0.265162	0.271207	0	0	0	0.168178	0.379989	1.90039	3.01266	1.07404	2.41391	0.502341	0.783394	0	1.06039	22.1979
Y organ	0	0							0	0							37.227	22.8558							0	0							0	0							2.31227	2.08979	0.336037	0.322993					0
ovary	0.517827	0.370352	1.04901	0.894078					0	0	0	0					5.84222	2.56997	27.0215	1.84329					0	0.566173	1.57974	1.12644					0	0.454067	0	0					1.93165	3.10521	1.99375	3.26967					8.77382
testis	2.01494	5.89766	5.12549	6.52797					0.379564	1.53117	2.96661	0					10.7455	5.91079	10.8629	5.2663					2.31656	2.54422	1.43827	1.53954					1.09513	1.40211	0.823584	0.225637					9.04705	10.733	10.2826	9.52733	4.38464	9.7014	8.06317	8.03466	0
androgenic gland	0	0.08572	0	0	0	0	0	3.71955	0	0	0	0	0	0	0	0	8.68792	9.01571	0.437977	5.19802	1.4095	3.7717	7.05654	31.4523	0	0	0	0	0	0	0	0	0	0	0	0.797788	0	0	0	1.26351	6.33334								0
muscle	0								0								20.234								0								0
These TPM values were extracted from "Eriocheir sinensis TPM" sheet.
[truncated: 15 more columns]
